# Supplementary material for: MAPRE2 mutations result in altered human cranial neural crest migration, underlying craniofacial malformations in CSC-KT syndrome
Source: PubMed Central journal article supplement (PMC7925611; doi:10.1038/s41598-021-83771-3), 2021-03-02
Supplement: 41598_2021_83771_MOESM1_ESM.pdf [file 41598_2021_83771_MOESM1_ESM.pdf]

## **SUPPLEMENTAL INFORMATION**

### **Title**

*MAPRE2* mutations result in altered cranial neural crest migration, underlying circumferential skin creases syndrome, Kunze type

### **Author list**

Cedric Thues, Jorge S. Valadas, Liesbeth Deaulmerie, Ann Geens, Amit K. Chouhan, Ramon Duran-Romaña, Joost Schymkowitz, Frederic Rousseau, Michaela Bartusel, Rizwan Rehim, Alvaro Rada-Iglesias, Patrik Verstreken, Hilde Van Esch

**Additional movie file 1** Bright field movie of wild type derived neural crest cells migrating into the scratched area during *in vitro* migration assay.

**Additional movie file 2** Movie of Mclover3 channel of wild type derived neural crest cells migrating into the scratched area during *in vitro* migration assay.

**Additional movie file 3** Movie of mCherry3 H2B channel of wild type derived neural crest cells migrating into the scratched area during *in vitro* migration assay.

**Additional table 1.** List of primers and antibodies

| Primer name                  | Sequence                 |
|------------------------------|--------------------------|
| qPCR MAPRE2 exon 6 Fw        | CTCTTCCCTGGCTGCATTAG     |
| qPCR MAPRE2 exon 6 Rv        | CGCTTAAATGATGCTTGCA      |
| qPCR MAPRE2 exon 8 Fw        | TCCAGCAGCTAAACCAGGAT     |
| qPCR MAPRE2 exon 8 Rv        | AGCTGTATGACCTGCGTTTCT    |
| GAPDH Fw                     | TCAAGAAGGTGGTGAAGCAGG    |
| GAPDH Rv                     | ACCAGGAAATGAGCTTGACAAA   |
| MAPRE2 sequencing exon 1 Fw  | GGCAGGAAGAGGTCACTAAAAAT  |
| MAPRE2 sequencing exon 1 Rv  | TAAGGAAGCATTTTCATTTCCAGA |
| MAPRE2 sequencing exon 2 Fw  | AAAAGTGGTTCTGCTGCTAACTG  |
| MAPRE2 sequencing exon 2 Rv  | GAAAAGAAAACCTGCCTTTTGTAT |
| MAPRE2 sequencing exon 3 Fw  | GACTTTTGGATATTTGGCGTGTA  |
| MAPRE2 sequencing exon 3 Rv  | TAATTAGCCCTTCGTACACTTGG  |
| MAPRE2 sequencing exon 4 Fw  | GAGAGCTGGGAGAAGGCAGT     |
| MAPRE2 sequencing exon 4 Rv  | ACCTATTCACAAAATGCTTTCCA  |
| MAPRE2 sequencing exon 5 Fw  | CAGAACCTGAGGAACATTTGG    |
| MAPRE2 sequencing exon 5 Rv  | TCTCAGCAAAGGAACCATGA     |
| MAPRE2 sequencing exon 6 Fw  | GTACAGTCCCTTCCCTCTAGCTC  |
| MAPRE2 sequencing exon 6 Rv  | CAGCCTACTGTTGGGATATCAAG  |
| MAPRE2 sequencing exon 7 Fw  | AAACAGTGCTGCCACAACTT     |
| MAPRE2 sequencing exon 7 Rv  | CTGGTCTGTACTGCCAGCAA     |
| MAPRE2 sequencing exon 8 Fw  | TGAGATAAGTTGCCAAAACAAC   |
| MAPRE2 sequencing exon 8 Rv  | CATGGGCTACTGATTTTGTCTTC  |
| MAPRE2 sequencing exon 9 Fw  | CCTGTTGTTTCTCCCTCAGACTT  |
| MAPRE2 sequencing exon 9 Rv  | ACGATGTTTATTCCTTTGGGACT  |
| MAPRE2 sequencing exon 10 Fw | TGATCTGTTCTTTGATCACATGG  |
| MAPRE2 sequencing exon 10 Rv | GTATGTGACCCTACGATCTCTCG  |
| M2 left junction assay Fw    | CCGTCCCATTAGAAGTTGAATAA  |
| M2 left junction assay Rv    | TACATTCTAGGTCGGGTTTGTA   |
| M2 right junction assay Fw   | GCAATAGCATCACAAATTCACA   |
| M2 right junction assay Rv   | CAAAGGAGGACTGCTTATTTCT   |
| M2 cell PCR Fw               | GGACTTTTACATGCCCTGGA     |
| M2 cell PCR Rv               | AACAAAACGCAGTCCTGTCC     |
| M1 left junction assay Fw    | ATCTCAACACAAGTGGGCTACAT  |
| M1 left junction assay Rv    | AAATCAGTGACACTTACCGCATT  |
| M1 right junction assay Fw   | AACCCCGACGGTACTAAAAGTT   |
| M1 right junction assay Rv   | GGTTCTCTTTCAGCACTTCTTGA  |
| M1 cell PCR Fw               | AAACAGTGCTGCCACAACTT     |
| M1 cell PCR Rv               | CTGGTCTGTACTGCCAGCAA     |
| qPCR OCT4 Fw                 | TCGAGAACCGAGTGAGAGG      |
| qPCR OCT4 Rv                 | GAACCACACTCGGACCACA      |
| qPCR SOX2 Fw                 | GAGTGGAACTTTTGTTCGGAGA   |
| qPCR SOX2 Rv                 | AGCGTGTACTTATCCTTCTTCAT  |
| qPCR p75 Fw                  | CCCTGTCTATTGCTCCATCC     |
| qPCR p75 Rv                  | GCTCCTTGCTTGTCTGCTT      |
| qPCR TFAP2A Fw               | ATGCTTTGGAAATTGACGGA     |
| qPCR TFAP2A Rv               | ATTGACCTACAGTGCCCAGC     |

|                |                      |
|----------------|----------------------|
| qPCR PHOX2B Fw | GGAGACTCACTACCCCGACA |
| qPCR PHOX2B Rv | CTCCTGCTTGCGAAACTTGG |
| qPCR ETS1 Fw   | CCAGACTTTGTTGGGGACAT |
| qPCR ETS1 Rv   | TCTGGATAGGCTGGGTTGAC |
| qPCR SOX10 Fw  | TACCCGCACCTGCACAAC   |
| qPCR SOX10 Rv  | TTCAGCAGCCTCCAGAGC   |

| <b>Name</b> | <b>Supplier</b> | <b>Cat#</b>     | <b>RRID</b> |
|-------------|-----------------|-----------------|-------------|
| OCT4        | Abcam           | ab19857         | AB_445175   |
| SOX2        | Bio-connect     | sc-365823       | AB_10842165 |
| NGFR p75    | Sigma Aldrich   | N3908           | AB_260763   |
| TFAP2A      | Sigma Aldrich   | HPA028850-100UL | AB_10600730 |
| GAPDH       | Abcam           | ab8245          | AB_2107448  |
| B tubulin   | Imtec           | 802001          | AB_2564645  |
| MAPRE2      | Sigma Aldrich   | HPA016739       | AB_1853570  |
| Vinculin    | Sigma Aldrich   | V9131-100UL     | AB_477629   |
| MACF1       | Thermo Fisher   | PA5-66976       | AB_2665172  |

Supplemental Fig. S1

**a**

|           | OCT4    |                   | SOX2    |                   | Nanog   |                   |
|-----------|---------|-------------------|---------|-------------------|---------|-------------------|
|           | Ct Mean | $\Delta$ Ct GAPDH | Ct Mean | $\Delta$ Ct GAPDH | Ct Mean | $\Delta$ Ct GAPDH |
| N68S/N68S | 15,741  | 1,589             | 18,698  | 4,544             | 19,665  | 5,512             |

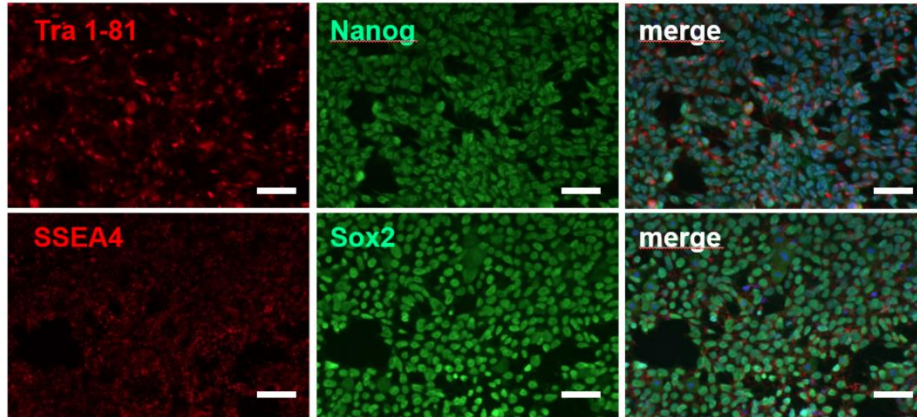

**b**

|                      | Self-renewal | Ectoderm | Mesoderm | Endoderm |  |
|----------------------|--------------|----------|----------|----------|--|
| N68S/N68S stem cells | -0,83        | 0,04     | -0,15    | -1,38    |  |
| N68S/N68S EB         | -6,32        | 2,01     | 1,79     | 2,46     |  |

  

|                      |               |
|----------------------|---------------|
| $x > 1.5$            | Upregulated   |
| $1.0 < x \leq 1.5$   |               |
| $0.5 < x \leq 1.0$   |               |
| $-0.5 \leq x < 0.5$  | Comparable    |
| $-1.0 \leq x < -0.5$ |               |
| $-1.5 \leq x < -1.0$ |               |
| $x < -1.5$           | Downregulated |

Gene expression relative to the reference standard

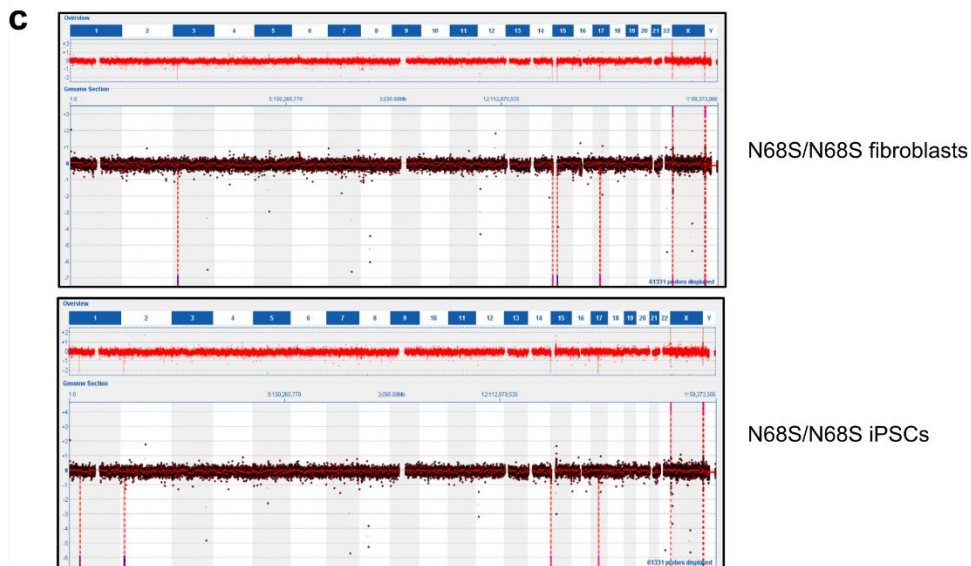

**Supplemental Fig. S1** Characterization of N68S/N68S patient derived iPSCs. **a** N68S/N68S derived iPSC clones express typical pluripotency markers as SOX2, Nanog, OCT4, TRA 1-81 and SSEA4, as shown by qPCR and immunostaining. Hoechst 33258 (blue) was used as nuclear marker. Scale bars: 50  $\mu$ m. **b** Results of embryoid body (EB) formation and characterization using the score card assay (three germ layer differentiation and loss of pluripotency marker gene expression). **c** Whole genome array comparative genome hybridisation performed on DNA from the original patient fibroblasts and the derived N68S/N68S iPSC line, showing stable reprogramming.

Supplemental Fig. S2

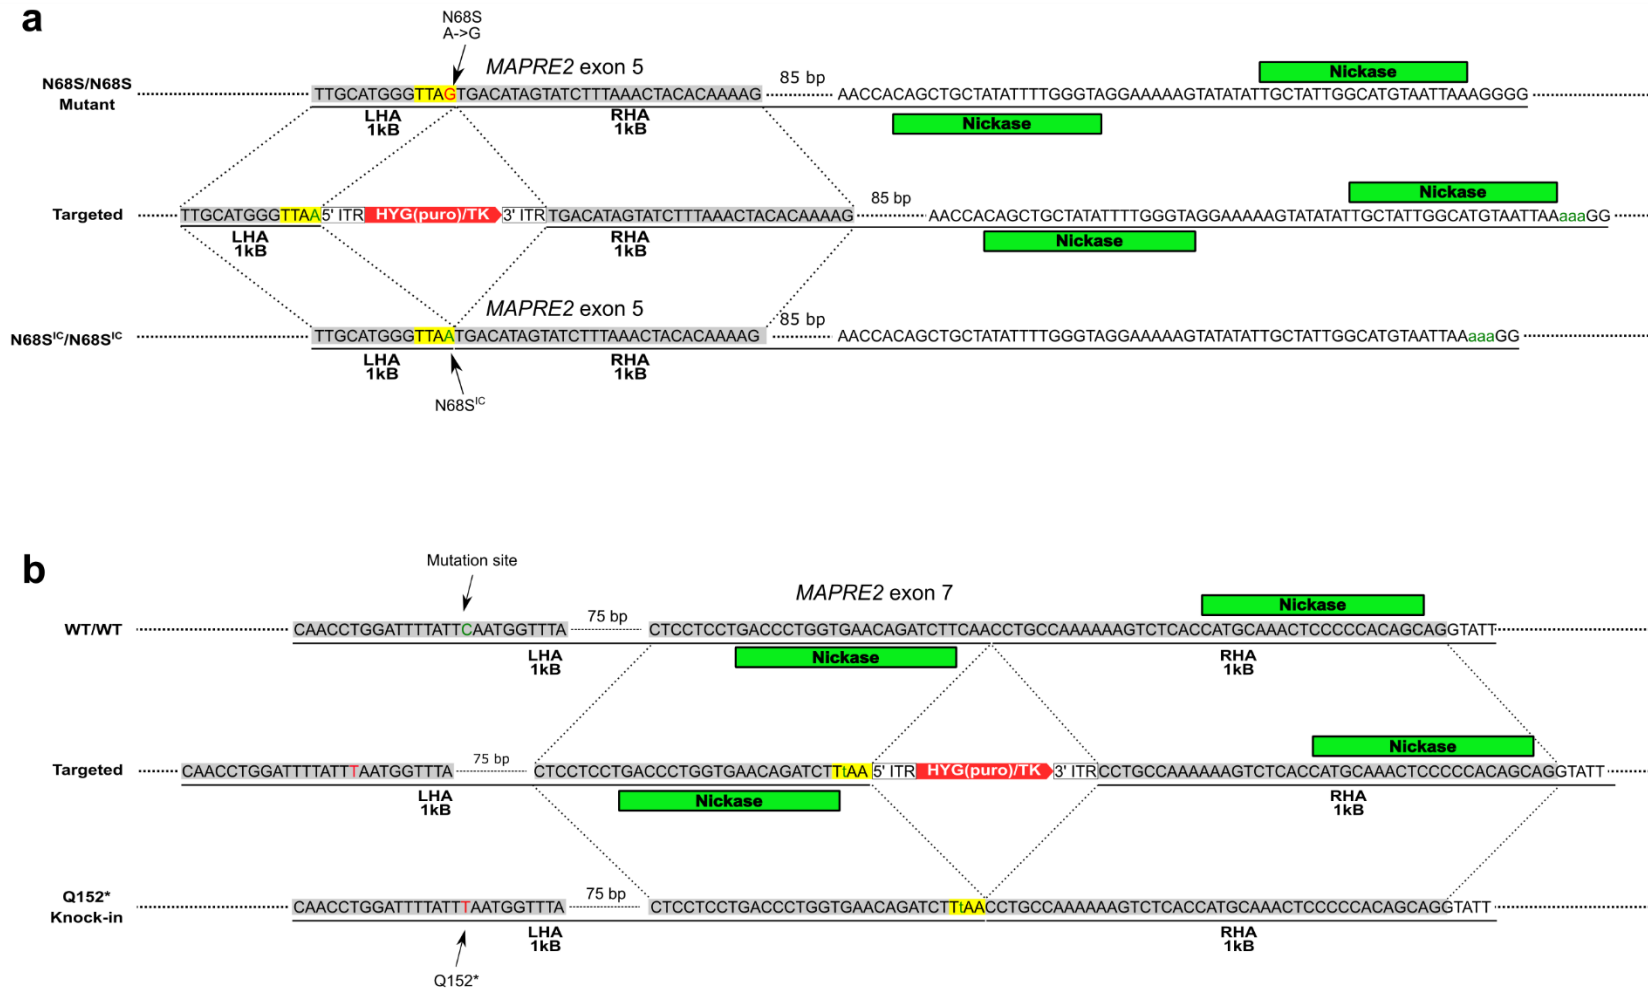

**Supplemental Fig. S2** Detailed CRISPR/Cas9 strategy for correction of N68S and knock-in of Q152\* mutations. **a** Detailed schematic of CRISPR/Cas9 strategy to correct the homozygous N68S/N68S mutation in patient derived iPSCs. Note the exonic regions are highlighted in grey and the CRISPR cut site is 148 bp away from the mutation site. Additionally, correction of the N68S mutation generates a TTAA site, which will be used afterwards to excise the selection cassette with PiggyBac Transposase. Lastly, one of the two PAM sequences is mutated to prevent re-cutting of the Cas9 proteins. **b** Detailed schematic of CRISPR/Cas9 strategy to introduce the premature stop codon Q152\*<sup>KI</sup> into a wild type background. Note the exonic region is highlighted in grey and the CRISPR cut site is 125 bp away from the mutation site. A silent mutation is introduced to create an endogenous TTAA site for excision and the selection cassette is introduced between the two gRNA sites to prevent re-cutting of the genome.

Supplemental Fig. S3

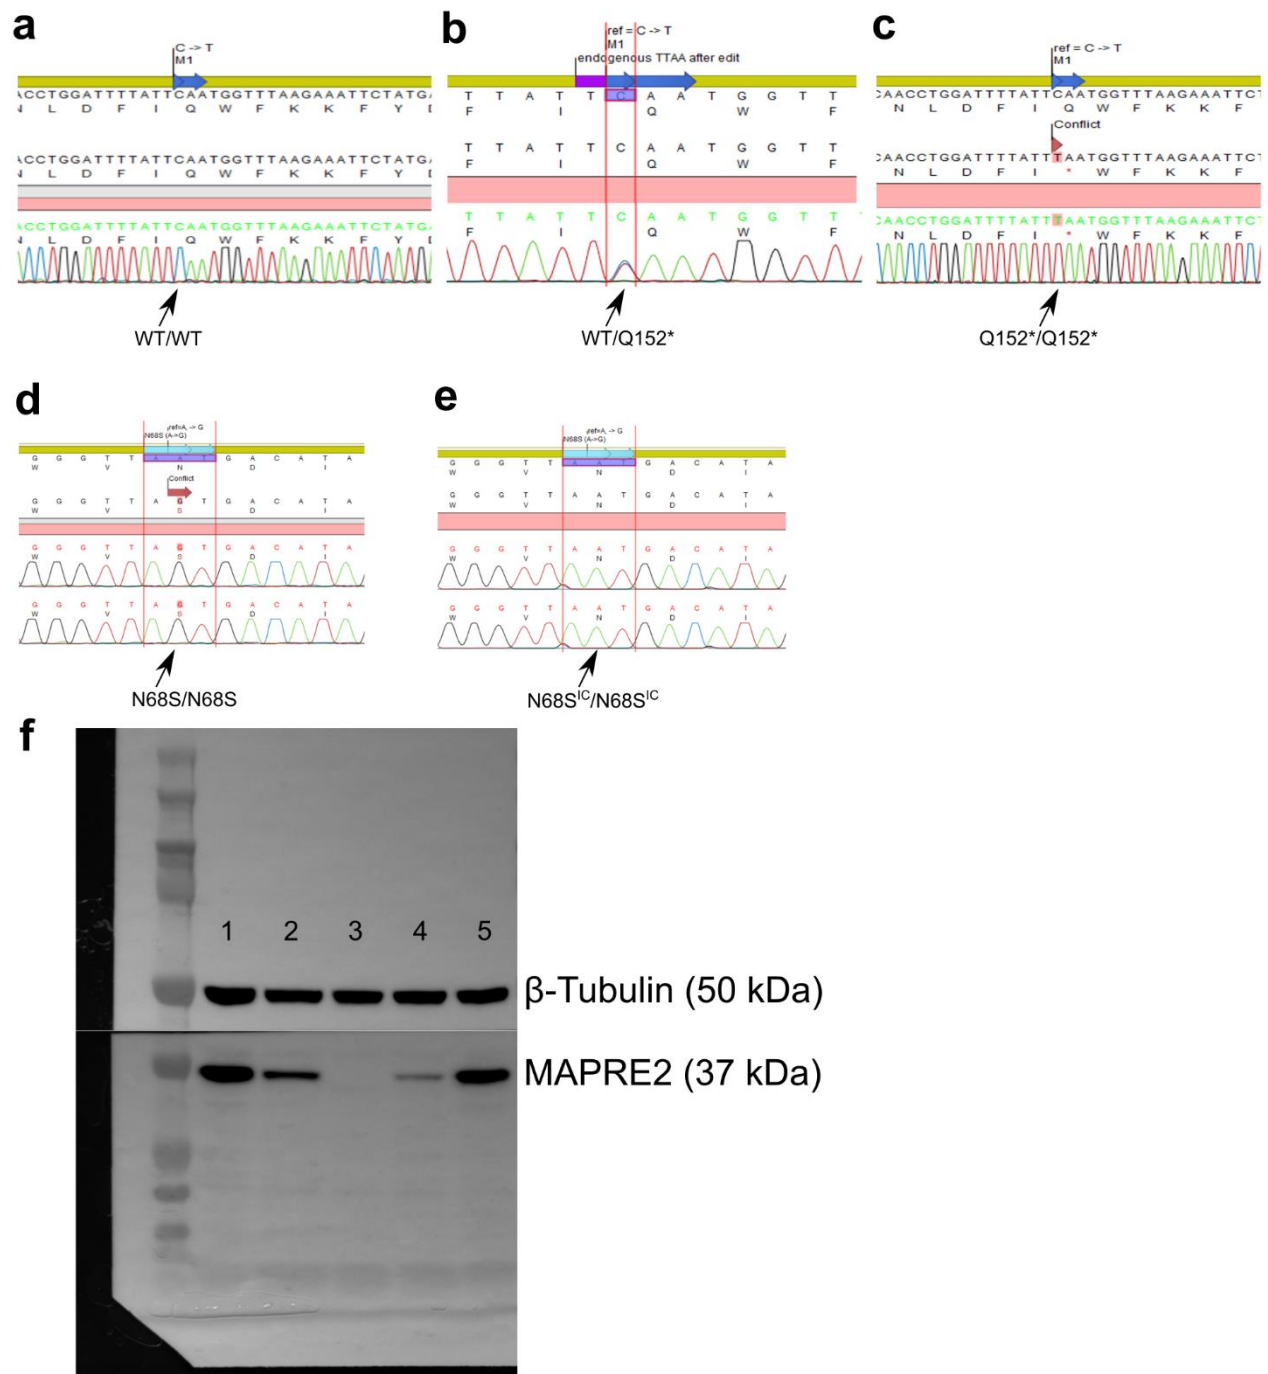

**Supplemental Fig. S3** Sanger sequencing confirmation of *MAPRE2* mutant cell lines and Western blot of *MAPRE2* protein expression in human iPSC. **a** Sanger sequencing of the WT/WT cell line in which the Q152\* mutation will be introduced. **b** Sanger sequencing of the Q152\*<sup>KI</sup>/WT Bj1 background cell line. Note the heterozygosity of the mutation by the overlap of two reads. **c** Sanger sequencing of the Q152\*<sup>KI</sup>/Q152\*<sup>KI</sup> Bj1 background cell line. **d** Sanger sequencing of N68S mutation in patient M2 (N68S/N68S) derived iPSCs. **e** Sanger sequencing of N68S<sup>IC</sup>/N68S<sup>IC</sup> isogenic control iPSCs. **f** Western blot image of *MAPRE2* protein expression in human iPSC. Ladder was taken in bright field. β-Tubulin ECL detection was exposed for 20 seconds. *MAPRE2* ECL detection was exposed for 30 seconds due to low concentration of target protein. (1. WT/WT 2. WT/Q152\*<sup>KI</sup> 3. Q152\*<sup>KI</sup>/Q152\*<sup>KI</sup> 4. N68S/N68S 5. N68S<sup>IC</sup>/N68S<sup>IC</sup>).

Supplemental Fig. S4

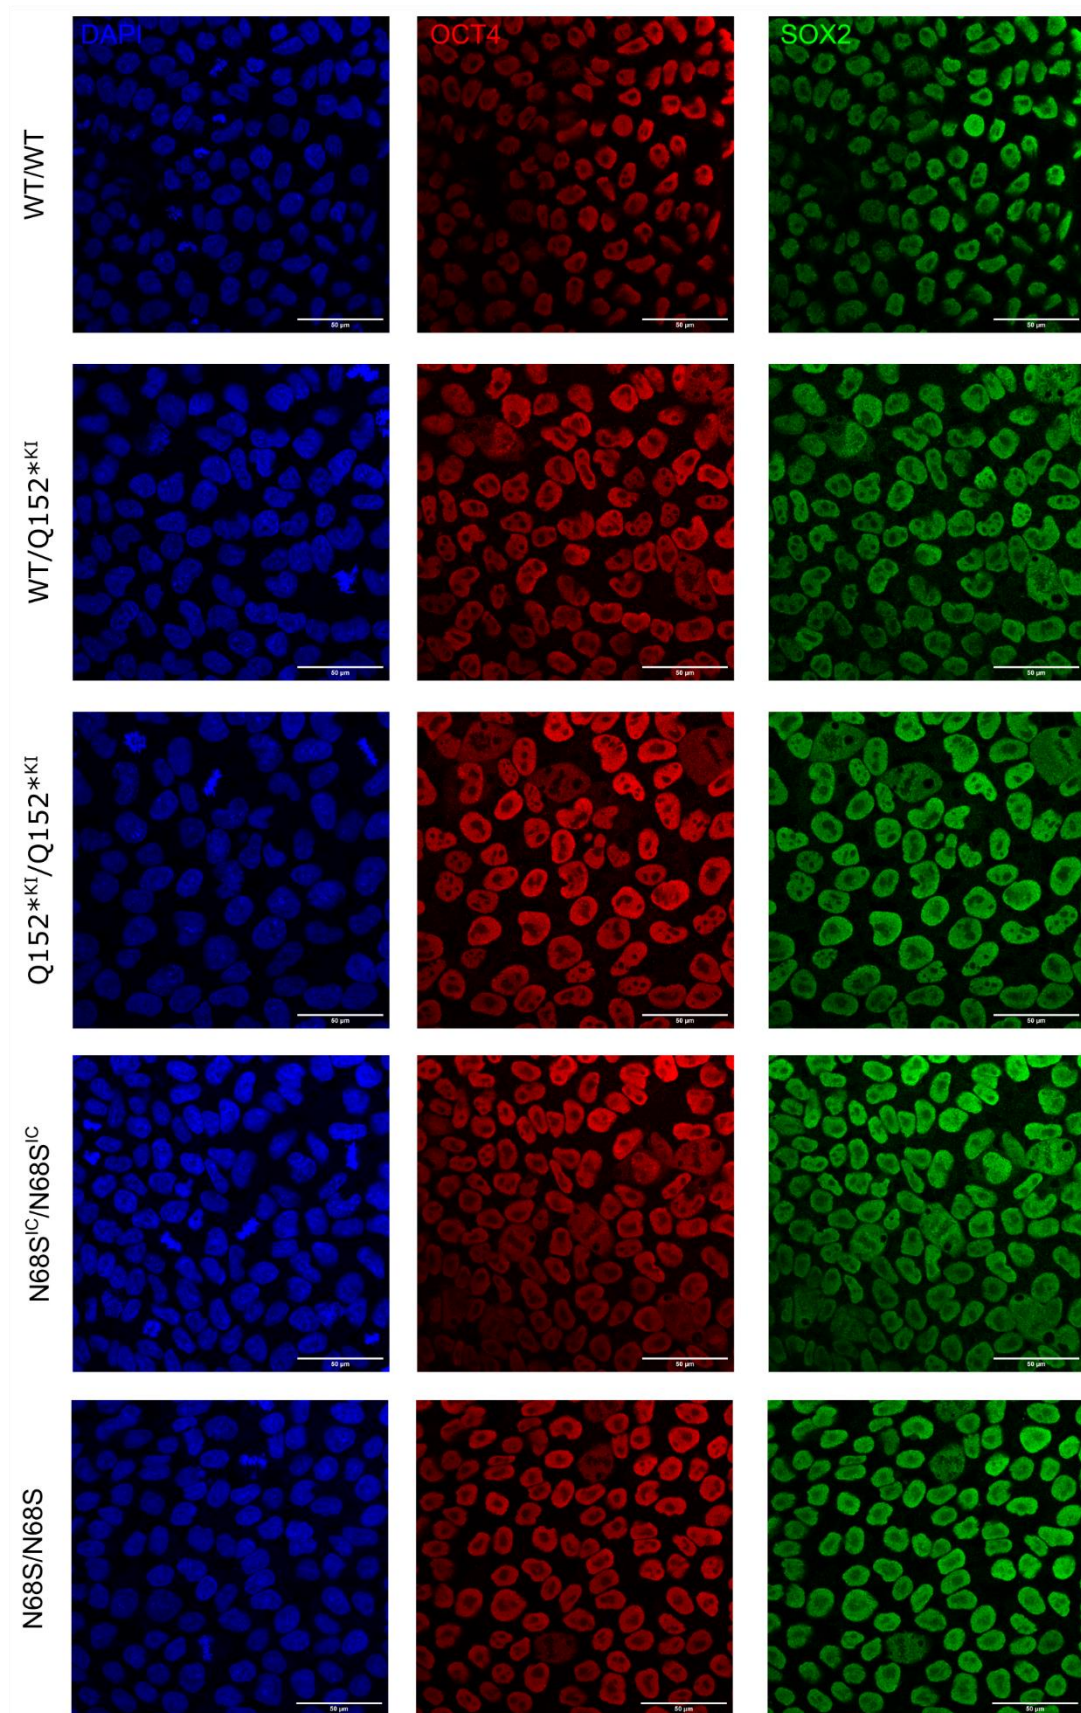

**Supplemental Fig. S4** Pluripotency validation staining of MAPRE2 induced pluripotent stem cell lines. Representative immunofluorescence images of human iPSC. Immunostaining against DAPI (blue) and pluripotency markers SOX2 (green) and Oct4 (red). Scale bar is 50 μm.



Supplemental Fig. S5

**a**

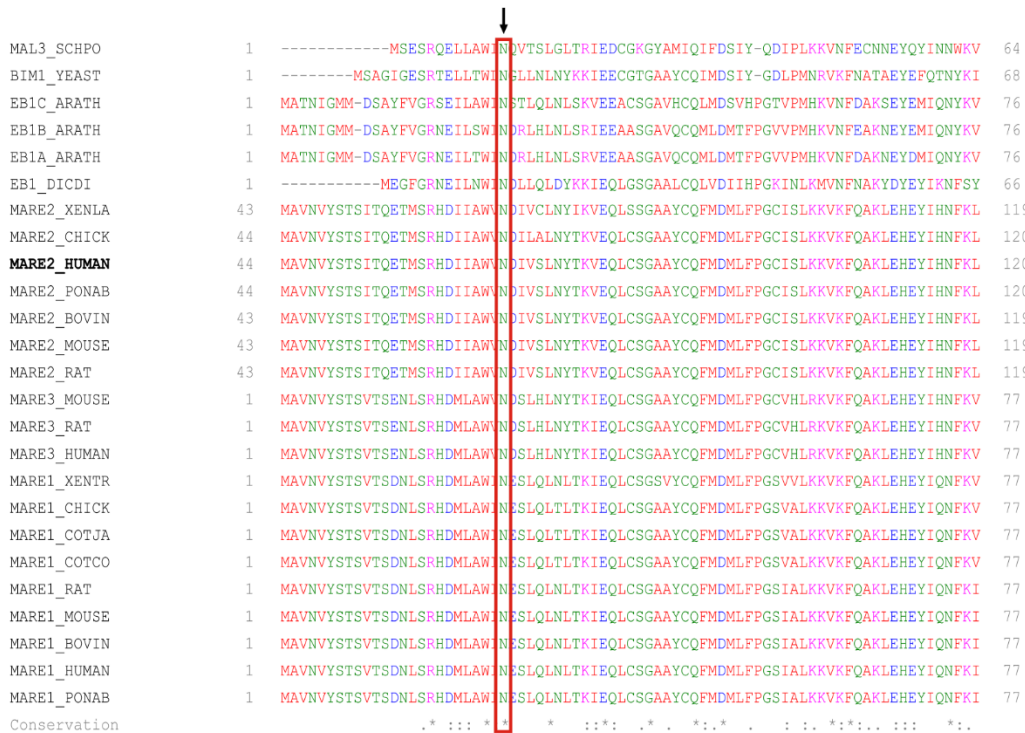

**b**

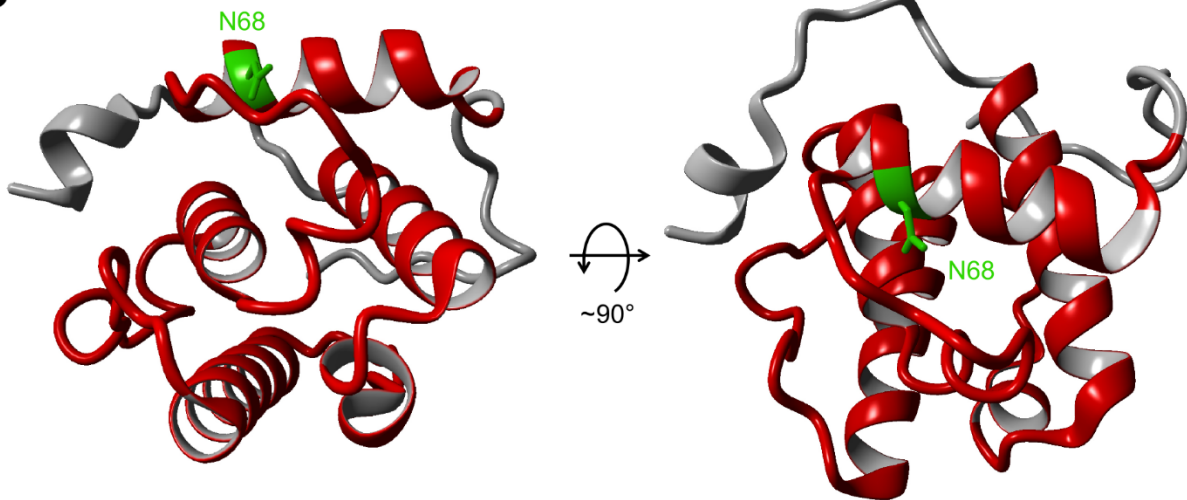

**c**

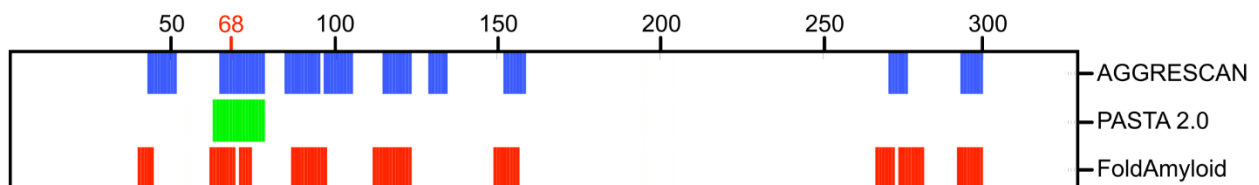

**Supplemental Fig. S5** Protein structure and conservation of MAPRE2. **a** Multiple sequence alignment of all 25 proteins classified as MAPRE family in UniProt. Only a small part of the sequence for each protein is shown. The red box the position of the highly conserved mutant residue. **b** Overview of the model structure of MAPRE2 with Calponin homology domain in red, Asn 68 residue in green and the rest in grey. **c** Aggregation propensity prediction using AGGRESCAN, PASTA 2.0 and FoldAmyloid.

Supplemental Fig. S6

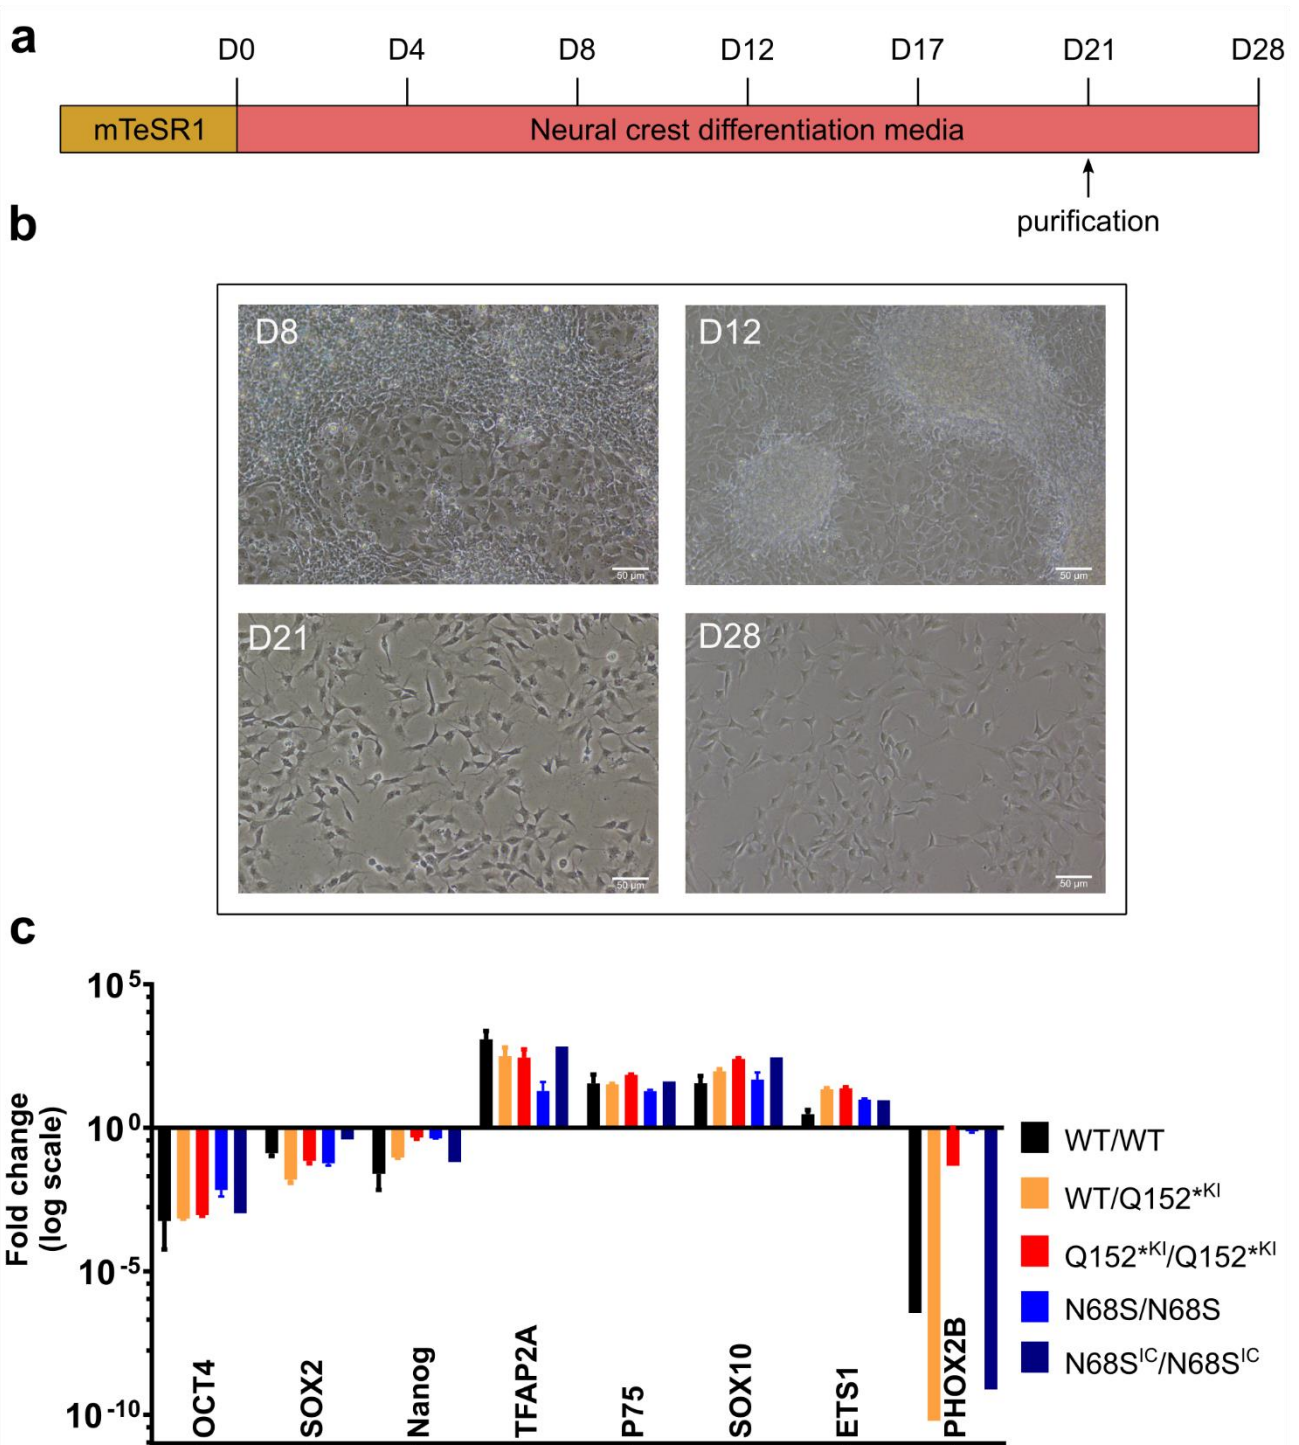

**Supplemental Fig. S6** Cranial neural crest differentiation protocol. **a** Timeline of our novel cranial neural crest differentiation protocol. **b** Bright field images during cranial neural crest differentiation of the WT/WT cell line. Scale bar is 50  $\mu$ m. **c** Gene expression fold changes in cranial neural crest compared to the iPSC stage after 28 days of differentiation (n=3). Note decrease in expression of pluripotency genes and upregulation of neural crest specific genes *TFAP2A*, *P75*, *SOX10*. Additionally, the expression of *ETS1* is upregulated while *PHOX2B* is downregulated, indicating the cranial identity.

Supplemental Fig. S7

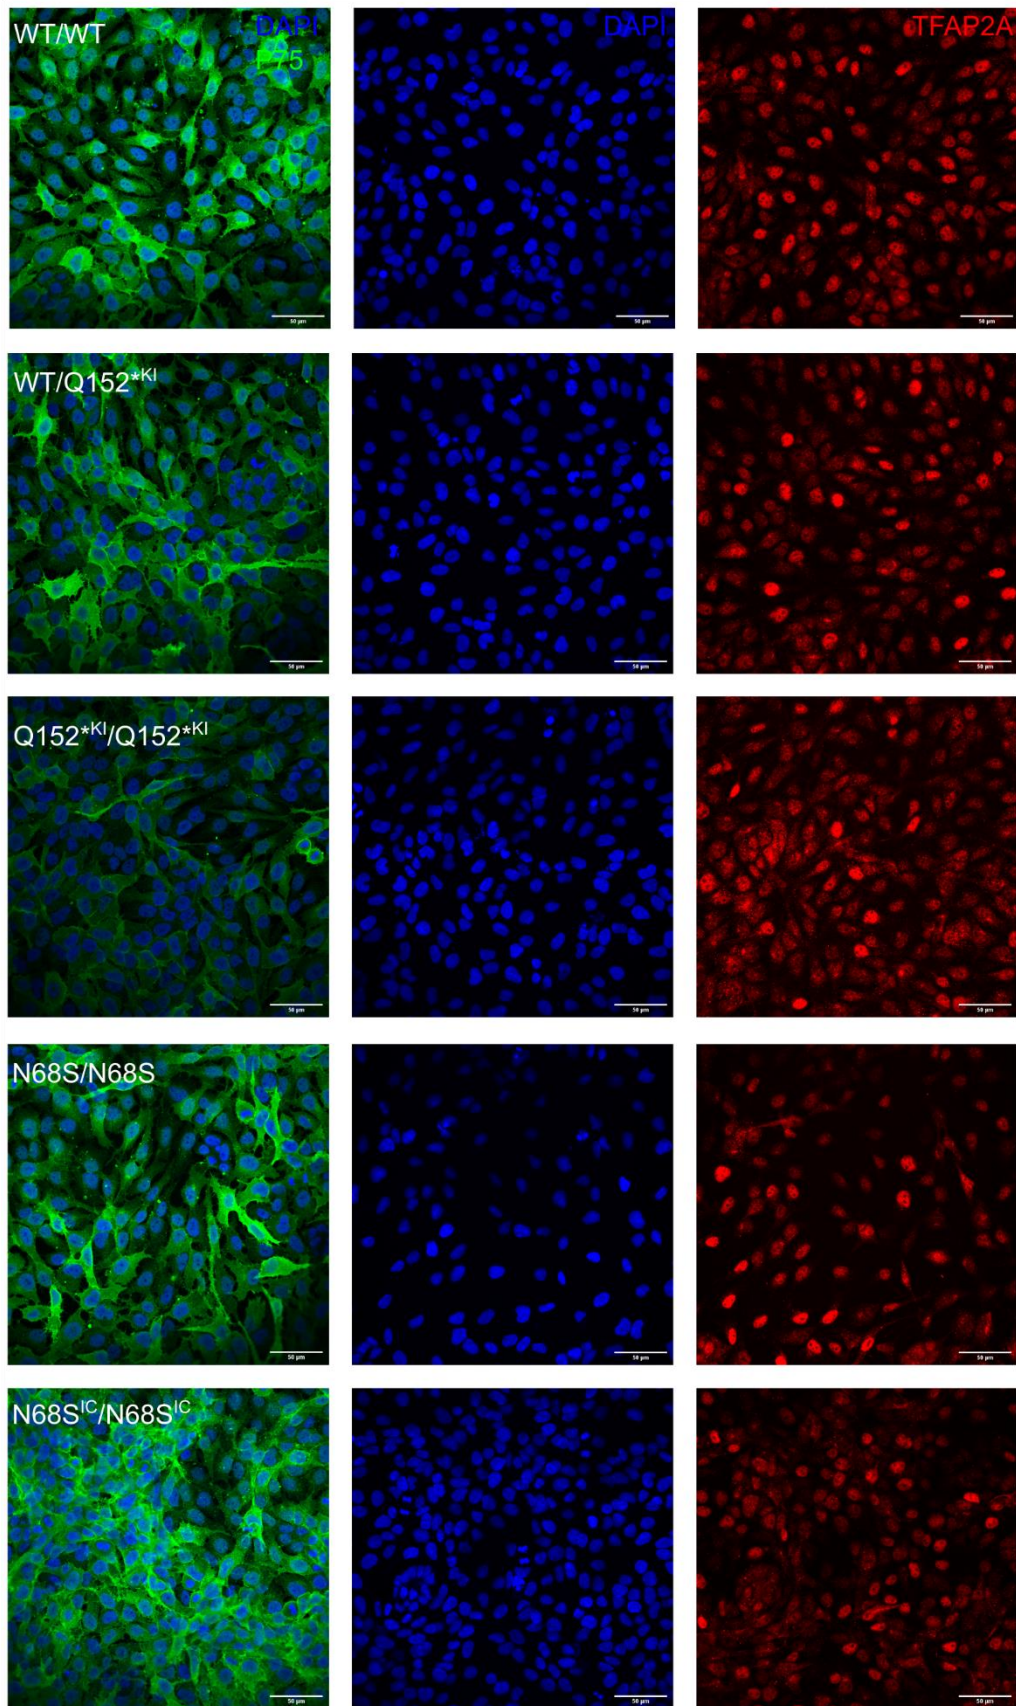

**Supplemental Fig. S7** Cranial neural crest staining. Representative immunofluorescence images of human iPSC derived cranial neural crest cells. Immunostaining against DAPI (blue), P75 (green) and TFAP2A (red). Scale bar is 50 µm.

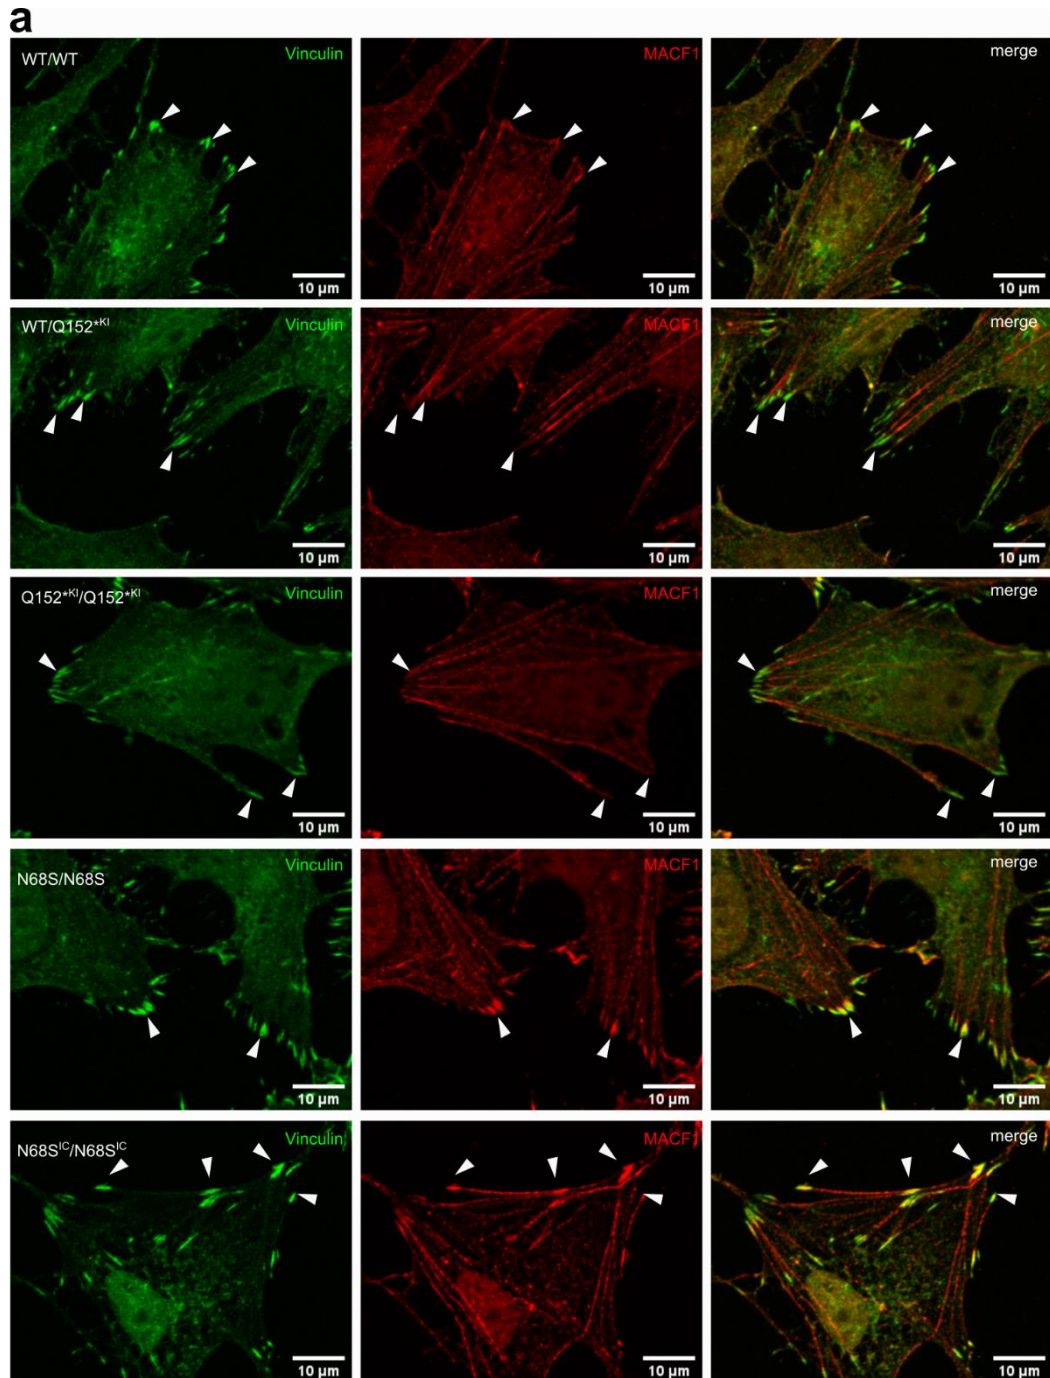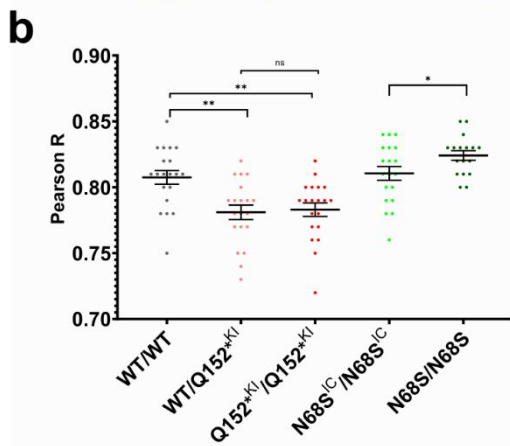

**Supplemental Fig. S8** Colocalisation of focal adhesion markers in cranial neural crest. **a** Representative confocal immunofluorescent images of human iPSC derived cranial neural crest cells. Immunostaining against Vinculin (green) and Macf1/Acf7 (red). White arrows indicate focal adhesion spots. Scale bar is 10  $\mu$ m. **b** Quantification of Vinculin and MACF1 colocalisation determined by Pearson correlation coefficient ( $n = >17$  cells per genotype). Note the reduction in colocalisation in the absence of MAPRE2 and the increase in colocalisation for N68S/N68S MAPRE2 mutant.
